# Supplementary material for: Sex differences in the association between ideal cardiovascular health and biomarkers of cardiovascular disease among adults in the United States: a cross-sectional analysis from the multiethnic study of atherosclerosis
Source: PubMed Central journal article supplement — BMJ Open. 2019 Nov 25;9(11):e031414. doi: 10.1136/bmjopen-2019-031414 (PMC6886920; doi:10.1136/bmjopen-2019-031414), 2019-11-25
Supplement: bmjopen-2019-031414supp001.pdf [file bmjopen-2019-031414supp001.pdf]

## SUPPLEMENTARY MATERIAL

Supplementary Methods: Assessment of cardiovascular health

Table S1: Baseline categories of income and education

Table S2: Definition of Life's Simple 7 Metrics

Table S3: Distribution of Life's Simple 7 Metrics by Sex

Table S4: The associations between CVH score and CVD-related biomarkers by Race/Ethnicity for Women

Table S5: The associations between CVH score and CVD-related biomarkers by Race/Ethnicity for Men

Table S6: The associations between CVH score and CVD-related biomarkers by Age for Women

Table S7: The associations between CVH score and CVD-related biomarkers by Age for Men

## Supplementary Methods: Assessment of cardiovascular health

Information on the LS7 metrics were collected from study participants at baseline. Based on AHA guidelines, ideal CVH is achieved if the following criteria are met for the LS7 metrics: non-smoking, physical activity at goal levels, BMI <25kg/m<sup>2</sup> and a healthy diet consistent with guidelines, total cholesterol <200mg/dL (not on lipid lowering medications), blood pressure <120/<80mmHg (not on anti-hypertensive medications), and fasting blood glucose <100mg/dL (not on diabetes medications) <sup>1</sup>. Smoking status was assessed by self-report and categorized as; 1) participants who never smoked or quit more than 12 months (non-smokers), 2) participants who quit within 12 months (former smokers) and 3) current smokers <sup>1</sup>. Physical activity was evaluated using a self-report survey instrument adapted from the Cross-Cultural Activity Participation Study <sup>2</sup> containing 28 questions on time and frequency of activities during a week in the previous month. The total minutes of moderate and vigorous exercise in metabolic equivalents of task (MET/min) were estimated and used for our analyses <sup>3</sup>.

BMI (kg/m<sup>2</sup>) was calculated using the weight and height measurements. Dietary habits were evaluated using a 120-item validated food frequency questionnaire modified from the Insulin Resistance Atherosclerosis Study instrument <sup>4, 5</sup>. Based on recommended dietary guidelines, a healthy diet was made up of fruits and vegetables, fish, whole grains and intake of sodium <1500mg per day and sugar-sweetened beverages ≤450 kcal (36 oz.) per week <sup>1</sup>. For blood pressure, with participants in a seated position, 3 measurements were obtained after resting for 5 minutes and the average values of the last two readings were recorded. For total cholesterol (mg/dL)

and blood glucose (mg/dL) measurements, blood samples were collected following a 12 hour fast.

**Table S1 - Baseline categories of income and education, N=5,379**

| Income |                   |           | Education |                                 |           |
|--------|-------------------|-----------|-----------|---------------------------------|-----------|
| 1      | < \$5,000         | 131 (2%)  | 1         | NO SCHOOLING                    | 60 (1%)   |
| 2      | \$5,000-\$7,999   | 214 (4%)  | 2         | GRADES 1-8                      | 558 (10%) |
| 3      | \$8,000-\$11,999  | 310 (6%)  | 3         | GRADES 9-11                     | 367 (7%)  |
| 4      | \$12,000-\$15,999 | 399 (7%)  | 4         | COMPLETED HIGH SCHOOL/GED       | 950 (18%) |
| 5      | \$16,000-\$19,999 | 275 (5%)  | 5         | SOME COLLEGE BUT NO DEGREE      | 855 (16%) |
| 6      | \$20,000-\$24,999 | 404 (8%)  | 6         | TECHNICAL SCHOOL CERTIFICATE    | 385 (7%)  |
| 7      | \$25,000-\$29,999 | 311 (6%)  | 7         | ASSOCIATE DEGREE                | 275 (5%)  |
| 8      | \$30,000-\$34,999 | 374 (7%)  | 8         | BACHELOR'S DEGREE               | 951 (18%) |
| 9      | \$35,000-\$39,999 | 313 (6%)  | 9         | GRADUATE OR PROFESSIONAL SCHOOL | 978 (18%) |
| 10     | \$40,000-\$49,999 | 517 (10%) |           |                                 |           |
| 11     | \$50,000-\$74,999 | 883 (16%) |           |                                 |           |
| 12     | \$75,000-\$99,999 | 483 (9%)  |           |                                 |           |
| 13     | \$100,000+        | 765 (14%) |           |                                 |           |

% are rounded to whole numbers

**Table S2 – Definition of the Life's Simple 7 metrics**

| <b>LS7 Metrics</b>       | <b>Score</b> | <b>Definition</b>                                                    |
|--------------------------|--------------|----------------------------------------------------------------------|
| <b>Smoking</b>           | 0            | Current smoker                                                       |
|                          | 1            | Former smoker, quit ≤12 months ago                                   |
|                          | 2            | Never smoker or quit >12 months ago                                  |
| <b>Body Mass Index</b>   | 0            | ≥30 kg/m <sup>2</sup>                                                |
|                          | 1            | 25.0–29.99 kg/m <sup>2</sup>                                         |
|                          | 2            | <25.0 kg/m <sup>2</sup>                                              |
| <b>Physical Activity</b> | 0            | No exercise                                                          |
|                          | 1            | 1–149 min of moderate exercise or 1–74 min of vigorous exercise/week |
|                          | 2            | 150+ min of moderate exercise or 75+ min of vigorous exercise/week   |
| <b>Diet</b>              | 0            | 0–1 components of healthy diet                                       |
|                          | 1            | 2–3 components of healthy diet                                       |
|                          | 2            | 4–5 components of healthy diet                                       |
| <b>Total Cholesterol</b> | 0            | ≥240 mg/dL                                                           |
|                          | 1            | 200–239 mg/dL or treated to <200mg/dL                                |
|                          | 2            | <200 mg/dL, unmedicated                                              |
| <b>Blood Pressure</b>    | 0            | SBP ≥140 mmHg or DBP ≥90 mmHg                                        |
|                          | 1            | SBP 120–139 mmHg or DBP 80–89 mmHg or treated to <120/80 mm Hg       |
|                          | 2            | <120/80 mm Hg, unmedicated                                           |
| <b>Blood Glucose</b>     | 0            | ≥126 mg/dL fasting                                                   |
|                          | 1            | 100–125 mg/dL fasting or treated to <100 mg/dL                       |
|                          | 2            | <100 mg/dL fasting, unmedicated                                      |

Adapted from Lloyd Jones et al<sup>1</sup> and Unger et al<sup>3</sup>, LS7 indicates Life's Simple 7; DBP, diastolic blood pressure, and SBP, systolic blood pressure. Poor=0 points; Intermediate=1 point; ideal =2 points. \*When combining vigorous and moderate exercise, vigorous exercise was weighted double.

Table S3 - Distribution of Life's Simple 7 Metrics by Sex

|                                                                                                                                                | Total (N=5,379) | Women (n= 2,775) | Men (n= 2,604) | P value |
|------------------------------------------------------------------------------------------------------------------------------------------------|-----------------|------------------|----------------|---------|
| <b>Total CVH score, mean (SD)</b>                                                                                                              | 8.6 (2.2)       | 8.6 (2.3)        | 8.6 (2.1)      | 0.85    |
| <b>LS7 metrics, n (%)</b>                                                                                                                      |                 |                  |                |         |
| <b>Smoking</b>                                                                                                                                 |                 |                  |                |         |
| Poor                                                                                                                                           | 671 (12)        | 303 (11)         | 368 (14)       | <0.001  |
| Intermediate                                                                                                                                   | 68 (1)          | 27 (1)           | 41 (2)         |         |
| Ideal                                                                                                                                          | 4640 (86)       | 2445 (88)        | 2195 (84)      |         |
| <b>Body mass index</b>                                                                                                                         |                 |                  |                |         |
| Poor                                                                                                                                           | 1657 (31)       | 958 (35)         | 699 (27)       | <0.001  |
| Intermediate                                                                                                                                   | 2127 (40)       | 936 (34)         | 1191 (46)      |         |
| Ideal                                                                                                                                          | 1595 (30)       | 881 (32)         | 714 (28)       |         |
| <b>Physical activity</b>                                                                                                                       |                 |                  |                |         |
| Poor                                                                                                                                           | 1231 (23)       | 684 (25)         | 547 (21)       | <0.001  |
| Intermediate                                                                                                                                   | 909 (17)        | 529 (19)         | 380 (15)       |         |
| Ideal                                                                                                                                          | 3239 (60)       | 1562 (56)        | 1677 (64)      |         |
| <b>Diet</b>                                                                                                                                    |                 |                  |                |         |
| Poor                                                                                                                                           | 2425 (45)       | 1029 (37)        | 1396 (54)      | <0.001  |
| Intermediate                                                                                                                                   | 2898 (54)       | 1699 (61)        | 1199 (46)      |         |
| Ideal                                                                                                                                          | 56 (1)          | 47 (2)           | 9 (0.4)        |         |
| <b>Total Cholesterol</b>                                                                                                                       |                 |                  |                |         |
| Poor                                                                                                                                           | 729 (14)        | 466 (17)         | 263 (10)       | <0.001  |
| Intermediate                                                                                                                                   | 2107 (39)       | 1143 (41)        | 964 (37)       |         |
| Ideal                                                                                                                                          | 2543 (47)       | 1166 (42)        | 1377 (53)      |         |
| <b>Blood pressure</b>                                                                                                                          |                 |                  |                |         |
| Poor                                                                                                                                           | 1996 (37)       | 1085 (39)        | 911 (35)       | <0.001  |
| Intermediate                                                                                                                                   | 1505 (28)       | 695 (25)         | 810 (31)       |         |
| Ideal                                                                                                                                          | 1878 (35)       | 995 (36)         | 883 (34)       |         |
| <b>Blood glucose</b>                                                                                                                           |                 |                  |                |         |
| Poor                                                                                                                                           | 572 (11)        | 275 (10)         | 297 (11)       | <0.001  |
| Intermediate                                                                                                                                   | 846 (16)        | 359 (13)         | 487 (19)       |         |
| Ideal                                                                                                                                          | 3961 (74)       | 2141 (77)        | 1820 (70)      |         |
| Abbreviations: CVH indicates cardiovascular health; SD, standard deviation; LS7, Life's Simple 7; percentages were rounded up to whole numbers |                 |                  |                |         |

**Table S4 - The associations between CVH score and CVD-related biomarkers by Race/Ethnicity for Women**

|                                | hsCRP<br>(mg/L)                | D-dimer<br>(µg/mL)              | Fibrinogen<br>(mg/dL)           | Homocysteine<br>(µmol/L)        | hs-cTnT<br>(ng/L)               | NT-ProBNP<br>(pg/mL)            | IL-6†<br>(pg/mL)               |
|--------------------------------|--------------------------------|---------------------------------|---------------------------------|---------------------------------|---------------------------------|---------------------------------|--------------------------------|
| <b>White, n=1,092</b>          |                                |                                 |                                 |                                 |                                 |                                 |                                |
| Model 1                        | <b>-0.18</b><br>(-0.21, -0.15) | <b>-0.06</b><br>(-0.08, -0.04)  | <b>-0.03</b><br>(-0.04, -0.03)  | <b>-0.02</b><br>(-0.03, -0.01)  | <b>-0.05</b><br>(-0.06, -0.04)  | 0.01<br>(-0.01, 0.04)           | <b>-0.10</b><br>(-0.12, -0.08) |
| Model 2                        | <b>-0.19</b><br>(-0.23, -0.16) | <b>-0.04</b><br>(-0.07, -0.02)  | <b>-0.03</b><br>(-0.04, -0.02)  | <b>-0.01</b><br>(-0.02, -0.002) | <b>-0.03</b><br>(-0.04, -0.02)  | <b>0.05</b><br>(0.03, 0.07)     | <b>-0.09</b><br>(-0.11, -0.07) |
| <b>Chinese-American, n=372</b> |                                |                                 |                                 |                                 |                                 |                                 |                                |
| Model 1                        | <b>-0.11</b><br>(-0.17, -0.06) | <b>-0.08</b><br>(-0.13, -0.04)  | <b>-0.02</b><br>(-0.02, -0.01)  | <b>-0.03</b><br>(-0.04, -0.02)  | <b>-0.05</b><br>(-0.07, -0.03)  | -0.01<br>(-0.06, 0.05)          | <b>-0.07</b><br>(-0.10, -0.04) |
| Model 2                        | <b>-0.13</b><br>(-0.18, -0.07) | -0.04<br>(-0.09, 0.01)          | <b>-0.01</b><br>(-0.02, -0.004) | <b>-0.01</b><br>(-0.03, -0.00)  | <b>-0.03</b><br>(-0.005, -0.01) | <b>0.07</b><br>(0.02, 0.12)     | <b>-0.06</b><br>(-0.10, -0.03) |
| <b>Black, n=681</b>            |                                |                                 |                                 |                                 |                                 |                                 |                                |
| Model 1                        | <b>-0.15</b><br>(-0.19, -0.11) | <b>-0.06</b><br>(-0.09, -0.03)  | <b>-0.03</b><br>(-0.03, -0.02)  | <b>-0.02</b><br>(-0.03, -0.01)  | <b>-0.04</b><br>(-0.06, -0.02)  | -0.02<br>(-0.06, 0.02)          | <b>-0.09</b><br>(-0.11, -0.07) |
| Model 2                        | <b>-0.15</b><br>(-0.19, -0.10) | <b>-0.05</b><br>(-0.08, -0.02)  | <b>-0.02</b><br>(-0.03, -0.02)  | <b>-0.01</b><br>(-0.02, -0.004) | <b>-0.03</b><br>(-0.05, -0.01)  | 0.005<br>(-0.03, 0.04)          | <b>-0.08</b><br>(-0.11, -0.06) |
| <b>Hispanic, n= 630</b>        |                                |                                 |                                 |                                 |                                 |                                 |                                |
| Model 1                        | <b>-0.13</b><br>(-0.17, -0.10) | <b>-0.03</b><br>(-0.07, -0.003) | <b>-0.01</b><br>(-0.02, -0.01)  | <b>-0.02</b><br>(-0.03, -0.01)  | <b>-0.04</b><br>(-0.05, -0.02)  | <b>-0.04</b><br>(-0.07, -0.003) | <b>-0.09</b><br>(-0.11, -0.07) |
| Model 2                        | <b>-0.14</b><br>(-0.18, -0.10) | -0.004<br>(-0.04, 0.03)         | <b>-0.01</b><br>(-0.02, -0.005) | <b>-0.01</b><br>(-0.02, -0.002) | <b>-0.02</b><br>(-0.04, -0.005) | 0.01<br>(-0.03, 0.04)           | <b>-0.08</b><br>(-0.10, -0.06) |

Abbreviations: CVH, cardiovascular health; CVD, cardiovascular disease; hsCRP; High-sensitivity C-reactive protein; hs-cTnT, high-sensitivity cardiac troponin T; NT-ProBNP, N-terminal pro B-type natriuretic peptide; IL-6, interleukin 6.

\*All biomarkers were log-transformed; CVH was assessed as a continuous variable. Results are presented as beta-coefficients (95% CI) from multivariable adjusted linear regression. Model 1 was unadjusted; Model 2 was adjusted for age, education, income, and health insurance status. Interpretation: For example, a 1-unit increment in the CVH score in White women corresponds to a 0.18 mg/L lower logCRP concentration. † For IL-6, Women: White, n=1,080; Chinese-American, n=371; Black, n=664; Hispanic, n=618

| <b>Table S5 - The associations between CVH score and CVD-related biomarkers by Race/Ethnicity for Men</b> |                                |                                |                                |                                 |                                |                                |                                |
|-----------------------------------------------------------------------------------------------------------|--------------------------------|--------------------------------|--------------------------------|---------------------------------|--------------------------------|--------------------------------|--------------------------------|
|                                                                                                           | hsCRP<br>(mg/L)                | D-dimer<br>(µg/mL)             | Fibrinogen<br>(mg/dL)          | Homocysteine<br>(µmol/L)        | hs-cTnT<br>(ng/L)              | NT-ProBNP<br>(pg/mL)           | IL-6†<br>(pg/mL)               |
| <b>White, n=1,058</b>                                                                                     |                                |                                |                                |                                 |                                |                                |                                |
| Model 1                                                                                                   | <b>-0.15</b><br>(-0.18, -0.12) | -0.02<br>(-0.05, 0.004)        | <b>-0.02</b><br>(-0.02, -0.01) | <b>-0.02</b><br>(-0.02, -0.01)  | <b>-0.04</b><br>(-0.06, -0.02) | 0.002<br>(-0.03, 0.03)         | <b>-0.08</b><br>(-0.10, -0.06) |
| Model 2                                                                                                   | <b>-0.14</b><br>(-0.17, -0.11) | -0.02<br>(-0.05, 0.005)        | <b>-0.02</b><br>(-0.02, -0.01) | <b>-0.02</b><br>(-0.02, -0.01)  | <b>-0.04</b><br>(-0.06, -0.03) | 0.01<br>(-0.02, 0.04)          | <b>-0.07</b><br>(-0.09, -0.05) |
| <b>Chinese-American, n= 361</b>                                                                           |                                |                                |                                |                                 |                                |                                |                                |
| Model 1                                                                                                   | <b>-0.09</b><br>(-0.15, -0.04) | -0.01<br>(-0.06, 0.04)         | <b>-0.01</b><br>(-0.02, -0.01) | <b>-0.02</b><br>(-0.03, -0.001) | <b>-0.06</b><br>(-0.08, -0.03) | 0.04<br>(-0.02, 0.11)          | -0.04<br>(-0.07, 0.0002)       |
| Model 2                                                                                                   | <b>-0.11</b><br>(-0.17, -0.05) | 0.001<br>(-0.05, 0.05)         | <b>-0.02</b><br>(-0.03, -0.01) | <b>-0.02</b><br>(-0.03, -0.002) | <b>-0.06</b><br>(-0.09, -0.04) | 0.02<br>(-0.03, 0.07)          | -0.03<br>(-0.07, 0.004)        |
| <b>Black, n= 572</b>                                                                                      |                                |                                |                                |                                 |                                |                                |                                |
| Model 1                                                                                                   | <b>-0.07</b><br>(-0.12, -0.03) | <b>-0.05</b><br>(-0.09, -0.01) | <b>-0.02</b><br>(-0.03, -0.01) | <b>-0.01</b><br>(-0.02, -0.001) | <b>-0.09</b><br>(-0.11, -0.06) | -0.03<br>(-0.08, 0.02)         | <b>-0.04</b><br>(-0.07, -0.02) |
| Model 2                                                                                                   | <b>-0.06</b><br>(-0.11, -0.02) | -0.02<br>(-0.06, 0.01)         | <b>-0.01</b><br>(-0.02, -0.01) | -0.01<br>(-0.02, 0.003)         | <b>-0.07</b><br>(-0.09, -0.05) | 0.02<br>(-0.03, 0.06)          | <b>-0.03</b><br>(-0.06, -0.01) |
| <b>Hispanic, n=613</b>                                                                                    |                                |                                |                                |                                 |                                |                                |                                |
| Model 1                                                                                                   | <b>-0.08</b><br>(-0.12, -0.04) | -0.03<br>(-0.06, 0.01)         | <b>-0.02</b><br>(-0.03, -0.01) | -0.001<br>(-0.01, 0.01)         | <b>-0.08</b><br>(-0.11, -0.06) | <b>-0.06</b><br>(-0.11, -0.01) | <b>-0.06</b><br>(-0.08, -0.03) |
| Model 2                                                                                                   | <b>-0.08</b><br>(-0.12, -0.04) | -0.01<br>(-0.04, 0.02)         | <b>-0.02</b><br>(-0.02, -0.01) | 0.003<br>(-0.01, 0.01)          | <b>-0.08</b><br>(-0.10, -0.05) | -0.03<br>(-0.07, 0.02)         | <b>-0.05</b><br>(-0.07, -0.02) |

Abbreviations: CVH, cardiovascular health; CVD, cardiovascular disease; hsCRP; High-sensitivity C-reactive protein; hs-cTnT, high-sensitivity cardiac troponin T; NT-proBNP, N-terminal pro B-type natriuretic peptide; IL-6, interleukin 6.

\*All biomarkers were log-transformed; CVH was assessed as a continuous variable. Results are presented as beta-coefficients (95% CI) from multivariable adjusted linear regression. Model 1 was unadjusted; Model 2 was adjusted for age, education, income, and health insurance status. Interpretation: For example, a 1-unit increment in the CVH score in White men corresponds to a 0.15mg/L lower logCRP concentration.

† For IL-6, Men: White, n=1,042; Chinese American, n=355; Black, n=554; Hispanic, n=595



**Table S6 - The associations between CVH score and CVD-related biomarkers by Age for Women**

|                                  | hsCRP<br>(mg/L)                | D-dimer<br>(µg/mL)             | Fibrinogen<br>(mg/dL)          | Homocysteine<br>(µmol/L)       | hs-cTnT<br>(ng/L)              | NT-proBNP<br>(pg/mL)         | IL-6†<br>(pg/mL)               |
|----------------------------------|--------------------------------|--------------------------------|--------------------------------|--------------------------------|--------------------------------|------------------------------|--------------------------------|
| <b>Age &lt;65 years, n=1,559</b> |                                |                                |                                |                                |                                |                              |                                |
| Model 1                          | <b>-0.22</b><br>(0.24, -0.19)  | <b>-0.07</b><br>(-0.09, -0.05) | <b>-0.03</b><br>(-0.04, -0.03) | <b>-0.02</b><br>(-0.02, -0.01) | <b>-0.03</b><br>(-0.03, -0.02) | <b>0.03</b><br>(0.01, 0.06)  | <b>-0.11</b><br>(-0.13, -0.10) |
| Model 2                          | <b>-0.19</b><br>(-0.21, -0.16) | <b>-0.04</b><br>(-0.06, -0.02) | <b>-0.03</b><br>(-0.03, -0.02) | <b>-0.01</b><br>(-0.02, -0.01) | <b>-0.02</b><br>(-0.03, -0.01) | <b>0.03</b><br>(0.004, 0.05) | <b>-0.09</b><br>(-0.10, -0.07) |
| <b>Age ≥ 65 years, n= 1,216</b>  |                                |                                |                                |                                |                                |                              |                                |
| Model 1                          | <b>-0.14</b><br>(-0.17, -0.11) | <b>-0.06</b><br>(-0.08, -0.04) | <b>-0.02</b><br>(-0.03, -0.02) | <b>-0.02</b><br>(-0.02, -0.01) | <b>-0.05</b><br>(-0.07, -0.04) | 0.02<br>(-0.01, 0.04)        | <b>-0.09</b><br>(-0.11, -0.07) |
| Model 2                          | <b>-0.12</b><br>(-0.15, -0.09) | <b>-0.03</b><br>(-0.06, -0.01) | <b>-0.02</b><br>(-0.02, -0.01) | <b>-0.01</b><br>(-0.02, -0.01) | <b>-0.05</b><br>(-0.06, -0.03) | 0.01<br>(-0.02, 0.03)        | <b>-0.07</b><br>(-0.09, -0.06) |

Abbreviations: CVH, cardiovascular health; CVD, cardiovascular disease; hsCRP, High-sensitivity C-reactive protein; hs-cTnT, high-sensitivity cardiac troponin T; NT-proBNP, N-terminal pro B-type natriuretic peptide; IL-6, interleukin 6.

\*All biomarkers were log-transformed; CVH was assessed as a continuous variable. Results are presented as beta-coefficients (95% CI) from multivariable adjusted linear regression. Model 1 was unadjusted; Model 2 was adjusted for race/ethnicity, education, income, and health insurance status. Interpretation: For example, a 1-unit increment in the CVH score in women <65 years corresponds to a 0.22mg/L lower logCRP concentration. † For IL-6, Women: Age <65, n=1,539 Age ≥ 65 years, n=1,194

**Table S7 - The associations between CVH score and CVD-related biomarkers by Age for Men**

|                                   | hsCRP<br>(mg/L)                | D-dimer<br>(µg/mL)              | Fibrinogen<br>(mg/dL)          | Homocysteine<br>(µmol/L)        | hs-cTnT<br>(ng/L)              | NT-proBNP<br>(pg/mL)   | IL-6†<br>(pg/mL)               |
|-----------------------------------|--------------------------------|---------------------------------|--------------------------------|---------------------------------|--------------------------------|------------------------|--------------------------------|
| <b>Age &lt;65 years, n= 1,454</b> |                                |                                 |                                |                                 |                                |                        |                                |
| Model 1                           | <b>-0.14</b><br>(-0.17, -0.12) | <b>-0.02</b><br>(-0.05, -0.003) | <b>-0.02</b><br>(-0.03, -0.02) | <b>-0.01</b><br>(-0.01, -0.001) | <b>-0.07</b><br>(-0.08, -0.06) | -0.02<br>(-0.04, 0.01) | <b>-0.07</b><br>(-0.09, -0.06) |
| Model 2                           | <b>-0.12</b><br>(-0.15, -0.10) | -0.02<br>(-0.04, 0.007)         | <b>-0.02</b><br>(-0.02, -0.01) | <b>-0.01</b><br>(-0.01, -0.00)  | <b>-0.07</b><br>(-0.08, -0.05) | -0.01<br>(-0.04, 0.02) | <b>-0.06</b><br>(-0.08, -0.04) |
| <b>Age ≥ 65 years, n= 1,150</b>   |                                |                                 |                                |                                 |                                |                        |                                |
| Model 1                           | <b>-0.11</b><br>(-0.14, -0.08) | <b>-0.05</b><br>(-0.07, -0.02)  | <b>-0.02</b><br>(-0.02, -0.01) | <b>-0.02</b><br>(-0.02, -0.01)  | <b>-0.06</b><br>(-0.08, -0.04) | 0.01<br>(-0.02, 0.04)  | <b>-0.06</b><br>(-0.08, -0.04) |
| Model 2                           | <b>-0.07</b><br>(-0.10, -0.04) | <b>-0.03</b><br>(-0.05, -0.001) | <b>-0.01</b><br>(-0.02, -0.01) | <b>-0.02</b><br>(-0.02, -0.01)  | <b>-0.05</b><br>(-0.07, -0.03) | 0.01<br>(-0.02, 0.05)  | <b>-0.04</b><br>(-0.06, -0.02) |

Abbreviations: CVH, cardiovascular health; CVD, cardiovascular disease; hsCRP; High-sensitivity C-reactive protein; hs-cTnT, high-sensitivity cardiac troponin T; NT-proBNP, N-terminal pro B-type natriuretic peptide; IL-6, interleukin 6.

\*All biomarkers were log-transformed; CVH was assessed as a continuous variable. Results are presented as beta-coefficients (95% CI) from multivariable adjusted linear regression. Model 1 was unadjusted; Model 2 was adjusted for race/ethnicity, education, income, and health insurance status. Interpretation: For example, a 1-unit increment in the CVH score in men <65 years corresponds to a 0.14mg/L lower logCRP concentration. † For IL-6, Men: Age <65, n=1,425; Age ≥ 65 years, n=1,121

## References for Supplementary Material

1. Lloyd-Jones DM, Hong Y, Labarthe D, et al. Defining and setting national goals for cardiovascular health promotion and disease reduction: the American Heart Association's strategic Impact Goal through 2020 and beyond. *Circulation* 2010; **121**:586-613.
2. Ainsworth BE, Irwin ML, Addy CL, et al. Moderate physical activity patterns of minority women: the Cross-Cultural Activity Participation Study. *J Womens Health Gend Based Med* 1999; **8**:805-13.
3. Unger E, Diez-Roux AV, Lloyd-Jones DM, et al. Association of neighborhood characteristics with cardiovascular health in the multi-ethnic study of atherosclerosis. *Circ Cardiovasc Qual Outcomes* 2014; **7**:524-31.
4. Block G, Woods M, Potosky A, et al. Validation of a self-administered diet history questionnaire using multiple diet records. *J Clinical Epidemiol* 1990; **43**:1327-35.
5. Mayer-Davis EJ, Vitolins MZ, Carmichael SL, et al. Validity and reproducibility of a food frequency interview in a Multi-Cultural Epidemiology Study. *Ann Epidemiol* 1999; **9**:314-24.
